# Supplementary material for: Bisphenols in Aquatic Products from South China: Implications for Human Exposure
Source: MDPI journal article supplement (doi:10.3390/toxics12020154), 2024-02-16
Supplement: s1 [file s1]

## **Supplementary materials**

# **Bisphenols in aquatic products from South China: Implications for human exposure**

**Yinhai Chen <sup>1,\*</sup>, Xiurong Chen <sup>1</sup>, Wenchi Lin <sup>1</sup>, Jinghong Chen <sup>1</sup>, Yuejun Zhu <sup>1</sup> and Zhang-hong Guo <sup>1</sup>**

<sup>1</sup> Center for Disease Control and Prevention of Shantou, Shantou China  
515041; 13829450098@163.com (X.C.); zhguo2889@163.com (Z.G.)

\* Correspondence: stcdcagsea@163.com; Tel.: +86-137-1991-5229

Number of pages (including this page): 6

Number of tables: 4

Number of figures: 1

**Table S1.** Mobile phase and gradient elution program.

| Time (min) | Mobile phase A (%) | Mobile phase B (%) |
|------------|--------------------|--------------------|
| 0          | 80.0               | 20.0               |
| 1.0        | 80.0               | 20.0               |
| 12.0       | 5.0                | 95.0               |
| 13.0       | 95.0               | 5.0                |
| 14.0       | 95.0               | 5.0                |
| 15.0       | 95.0               | 5.0                |

**Table S2.** Mass spectrometric information of the target compounds.

| Chemicals                           | Precursor ion<br>( <i>m/z</i> ) | Product ion<br>( <i>m/z</i> ) | Dwell<br>(msec) | DP<br>(V) | CE<br>(V) | EP<br>(V) | CXP<br>(V) |
|-------------------------------------|---------------------------------|-------------------------------|-----------------|-----------|-----------|-----------|------------|
| BPA                                 | 227.10                          | 212.10                        | 25.00           | -90.00    | -24.00    | -10.00    | -13.00     |
|                                     | 227.10                          | 92.00                         | 25.00           | -90.00    | -35.00    | -10.00    | -13.00     |
| BPS                                 | 249.20                          | 108.10                        | 25.00           | -100.00   | -36.00    | -10.00    | -13.00     |
|                                     | 249.20                          | 156.00                        | 25.00           | -100.00   | -29.00    | -10.00    | -13.00     |
| BPF                                 | 199.00                          | 92.80                         | 25.00           | -80.00    | -28.00    | -10.00    | -13.00     |
|                                     | 199.00                          | 77.00                         | 25.00           | -80.00    | -33.00    | -10.00    | -13.00     |
| BPP                                 | 345.00                          | 330.00                        | 25.00           | -90.00    | -30.00    | -10.00    | -13.00     |
|                                     | 345.00                          | 92.00                         | 25.00           | -90.00    | -62.00    | -10.00    | -13.00     |
| BPB                                 | 241.00                          | 211.00                        | 25.00           | -90.00    | -35.00    | -10.00    | -13.00     |
|                                     | 241.00                          | 225.00                        | 25.00           | -90.00    | -25.00    | -10.00    | -13.00     |
| BPZ                                 | 267.00                          | 173.00                        | 25.00           | -100.00   | -36.00    | -10.00    | -13.00     |
|                                     | 267.00                          | 223.00                        | 25.00           | -100.00   | -43.00    | -10.00    | -13.00     |
| BPAF                                | 335.00                          | 265.00                        | 25.00           | -100.00   | -30.00    | -10.00    | -13.00     |
|                                     | 335.00                          | 69.20                         | 25.00           | -100.00   | -70.00    | -10.00    | -13.00     |
| BPAP                                | 289.00                          | 274.00                        | 25.00           | -90.00    | -35.00    | -10.00    | -13.00     |
|                                     | 289.00                          | 211.00                        | 25.00           | -90.00    | -35.00    | -10.00    | -13.00     |
| BPA- <sup>13</sup> C <sub>12</sub>  | 239.00                          | 224.00                        | 25.00           | -100.00   | -25.00    | -10.00    | -13.00     |
| BPAF- <sup>13</sup> C <sub>12</sub> | 347.00                          | 277.10                        | 25.00           | -15.00    | -28.00    | -10.00    | -13.00     |
| BPB- <sup>13</sup> C <sub>12</sub>  | 253.10                          | 223.90                        | 25.00           | -180.00   | -42.00    | -10.00    | -13.00     |
| BPF- <sup>13</sup> C <sub>12</sub>  | 208.90                          | 97.10                         | 25.00           | -100.00   | -32.00    | -10.00    | -13.00     |
| BPS- <sup>13</sup> C <sub>12</sub>  | 261.10                          | 113.90                        | 25.00           | -170.00   | -36.00    | -10.00    | -13.00     |

DP: Declustering voltage; CE: Collision energy; EP: Injection voltage; CXP: Injection voltage from collision chamber.

**Table S3.** Linear equations and related quality control indicators for each analyte.

| Analyte | Linear equations   | Linearity<br>( $R^2$ ) | LOD<br>(ng/g) | LOQ<br>(ng/g) | Linearity range<br>( $\mu\text{g/L}$ ) | Recovery<br>(%) |
|---------|--------------------|------------------------|---------------|---------------|----------------------------------------|-----------------|
| BPA     | $Y=0.9994x+0.0267$ | 0.999                  | 0.0437        | 0.230         | 0.1-50                                 | 91.1            |
| BPS     | $Y=1.0024x-0.0909$ | 0.997                  | 0.0022        | 0.007         | 0.1-50                                 | 84.8            |
| BPF     | $Y=1.0096x-0.4314$ | 0.999                  | 0.0780        | 0.257         | 0.1-50                                 | 87.2            |
| BPP     | $Y=1.0817x-0.01$   | 0.999                  | 0.0700        | 0.230         | 0.1-50                                 | 107             |
| BPB     | $Y=1.0012x-0.0524$ | 0.999                  | 0.0690        | 0.240         | 0.1-50                                 | 111             |
| BPZ     | $Y=1.0899x-0.4142$ | 0.999                  | 0.0130        | 0.052         | 0.1-50                                 | 94.9            |
| BPAF    | $Y=0.9983x+0.0651$ | 0.999                  | 0.0900        | 0.300         | 0.1-50                                 | 97.7            |
| BPAP    | $Y=1.073x+0.2455$  | 0.997                  | 0.0120        | 0.040         | 0.1-50                                 | 99.7            |

LOQ: limits of quantification; LOD: limits of detection.

**Table S4.** Test the difference of concentration levels of BPs in aquatic products with or without enzymatic hydrolysis.

| Testing Statistic   | BPA    | BPS    | BPF    | BPP    | BPZ    | BPAP   | BPB    |
|---------------------|--------|--------|--------|--------|--------|--------|--------|
| Mann-Whitney U test | 15311  | 16949  | 27166  | 20250  | 13588  | 11335  | 28829  |
| Wilcoxon-W          | 45201  | 47084  | 57301  | 50385  | 43723  | 41470  | 58719  |
| rank                | -9.800 | -8.290 | -1.927 | -7.245 | -11.74 | -13.93 | -0.806 |
| <i>p</i> value      | 0.000  | 0.000  | 0.050  | 0.000  | 0.000  | 0.000  | 0.420  |

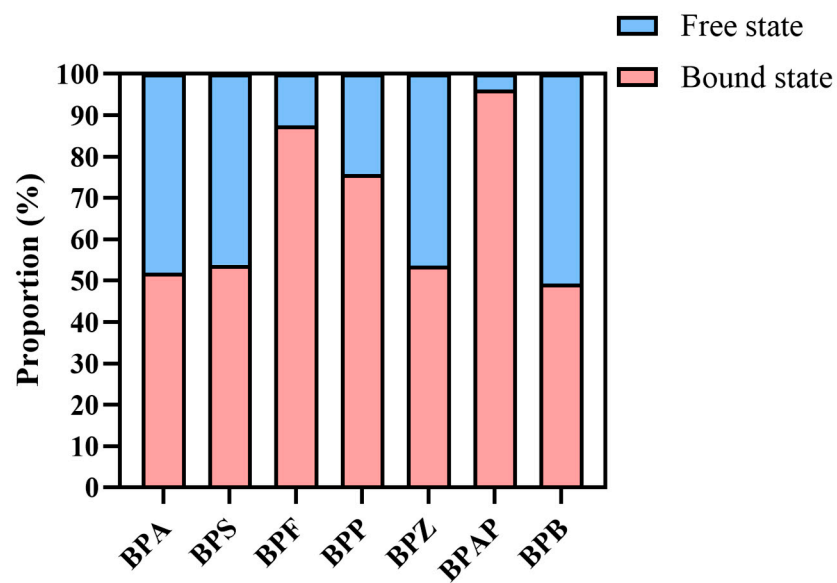

**Figure S1.** Average concentration distribution of free and bound BPs in aquatic products.
